# Supplementary material for: Sensitivity of young water fractions to hydro-climatic forcing and landscape properties across 22 Swiss catchments
Source: Copernicus journal article supplement (doi:10.5194/hess-2017-720), 2017-12-18
Supplement: Supplementary file 1 [file hess-2017-720-supplement.zip]

Archive with 2 entries (2 files):
- hess-2017-720_Supplement.pdf
- IRLS_hess-2017-720.R
